# Supplementary material for: High Expression of THY1 in Gallbladder Fibroblasts Promotes the Formation and Progression of Gallstones
Source: Research Square preprint supplement (doi:10.21203/rs.3.rs-7276422/v1), 2025-08-12
Supplement: Supplementary file 1 [file 9e64b907f7a77fef839d4c19.docx]

| **Table 1.** |  |  |
| --- | --- | --- |
| Primer sequences used in techniques like PCR | | |
| gene | Forward | Reverse |
| THY1 | CTCAGGCACCCTTGGGATAC | GTAGTCGCCCTCATCCTTG |
| IL6 | TACCACTTCACAAGTCGGAGGC | CTGCAAGTGCATCATCGTTGTTC |
| TNFα | GGTGCCTATGTCTCAGCCTCTT | GCCATAGAACTGATGAGAGGGAG |
| IL1β | TGGACCTTCCAGGATGAGGACA | GTTCATCTCGGAGCCTGTAGTG |
| IL8 | GGTGATATTCGAGACCATTTACTG | GCCAACAGTAGCCTTCACCCAT |
| IL4 | ATCATCGGCATTTTGAACGAGGTC | ACCTTGGAAGCCCTACAGACGA |
